# Supplementary material for: Space oddity: Absence of prezygotic-premating barriers in Eurydema lundbladi and Eurydema ornata
Source: Research Square preprint supplement (doi:10.21203/rs.3.rs-5341557/v1), 2024-11-07
Supplement: Supplementary file 1 [file e0697f4984594c94d230a06f.docx]

**SUPPLEMENTARY INFORMATION**

**Space oddity: Absence of prezygotic-premating barriers in *Eurydema lundbladi* and *Eurydema ornata***

*Journal of Insect Conservation*

Mario Alamo1, 2, *, Diego Gil-Tapetado1,3

1 Universidad Internacional Menéndez Pelayo, C. de Isaac Peral, 23, Moncloa - Aravaca, 28040 Madrid, Spain

2 Museo Nacional de Ciencias Naturales, José Gutiérrez Abascal 2, 28006, Madrid, Spain

3 Universidad Complutense de Madrid, Facultad de Ciencias Biológicas. Departamento de Biodiversidad, Ecología y Evolución, José Antonio Nováis 12, 28040, Madrid, Spain

*corresponding author mario.alamodelolmo@hotmail.com


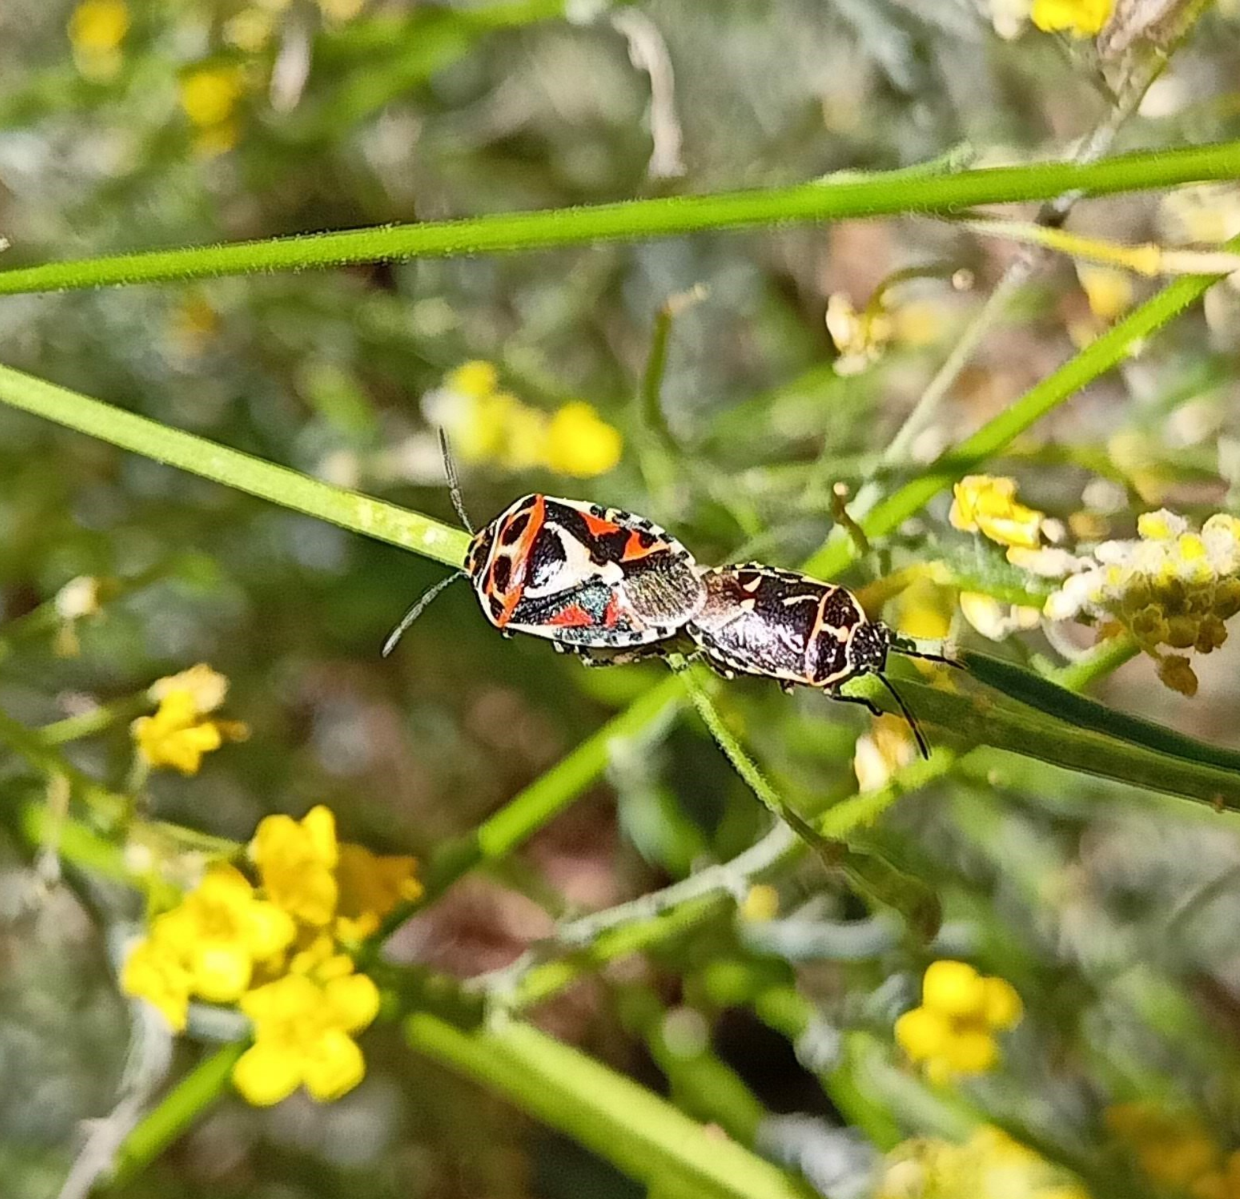


**Fig. S1** Interspecific copulation recorded at Pico de la Nieve, La Palma, Canary Islands in 2023. Eurydema lundbladi ♂ and Eurydema ornata ♀. Photographs by A.M.


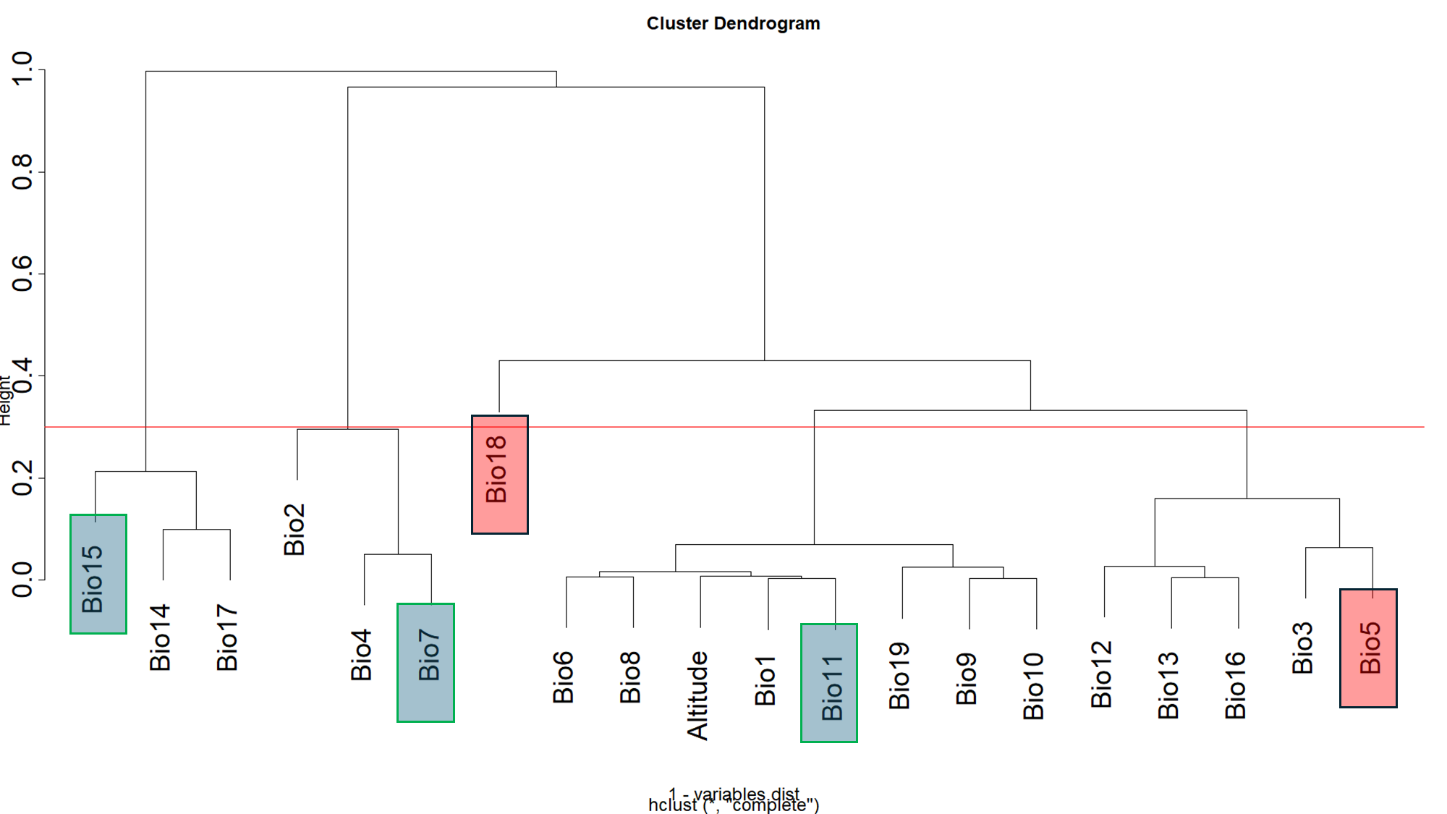


**Fig. S2** Dendrogram obtained from the cluster analysis used to select the relevant WorldClim variables (in blue boxes; red boxes represent variables discarded by the VIF analysis); the red horizontal line indicates the chosen distance-threshold to form the clusters (i.e., 0.3 or less than 70% correlation).
